# Supplementary material for: Antitumor Effects of a New Retinoate of the Fungal Cytotoxin Illudin M in Brain Tumor Models
Source: MDPI journal article supplement (doi:10.3390/ijms23169056), 2022-08-13
Supplement: s1 [file s1]

## **Supplementary Material**

### **Antitumor effects of a new retinoate of the fungal cytotoxin illudin M in brain tumor models**

Benedikt Linder<sup>1#</sup>, Miroslava Zoldakova<sup>2#</sup>, Zsuzsanna Kornyei<sup>3</sup>, Leonhard H. F. Köhler<sup>2</sup>, Sebastian Seibt<sup>2</sup>, Dominic Menger<sup>1</sup>, André Wetzel<sup>2</sup>, Emília Madarász<sup>3</sup>, Rainer Schobert<sup>2</sup>, Donat Kögel<sup>1</sup> and Bernhard Biersack<sup>\*,2</sup>

<sup>1</sup>Experimental Neurosurgery, Frankfurt University Hospital, Theodor-Stern-Kai 7, 60590 Frankfurt am Main, Germany

<sup>2</sup>Organic Chemistry 1, University of Bayreuth, Universitaetsstrasse 30, 95440 Bayreuth, Germany

<sup>3</sup>Laboratory of Cellular and Developmental Neurobiology, Institute of Experimental Medicine of the Hungarian Academy of Sciences, Szigony utca 43, HU-1083 Budapest, Hungary.

### Stability Tests

The stability of compound **2** in medium (DMEM) was investigated for the indicated times (Table S1). For the preparation of the calibration samples, stock solutions of the test compounds (1 mg /mL) in MeCN were initially made. The sample was diluted to 0.2 mg/mL in a mixture of MeCN/H<sub>2</sub>O (4:1), whereof 20 µL were taken and injected into the column. For HPLC analysis, a Prontosil 120-5-C18 ace EPS 5 µm column was applied, and MeCN/H<sub>2</sub>O + 0.1 % glacial acetic acid was used as eluent. Chromatography was run from 7030 to 9010 within 3 min for 40 min.

**Table S1.** Stability of compound **2** in medium.

| Sample           | Detected Compounds (in µM) |               |      |
|------------------|----------------------------|---------------|------|
|                  | 1                          | Retinoic acid | 2    |
| <b>2</b> (0 h)   | <0.01                      | <0.01         | 3.92 |
| <b>2</b> (20 h)  | <0.01                      | <0.01         | 3.98 |
| <b>2</b> (48 h)  | <0.01                      | <0.01         | 3.85 |
| <b>2</b> (144 h) | <0.01                      | <0.01         | 3.94 |
